# Supplementary material
Source: PubMed Central journal article supplement (PMC5004969)
Supplement: JCI87828.sd.pdf [file JCI87828.sd.pdf]

**Figure S1**

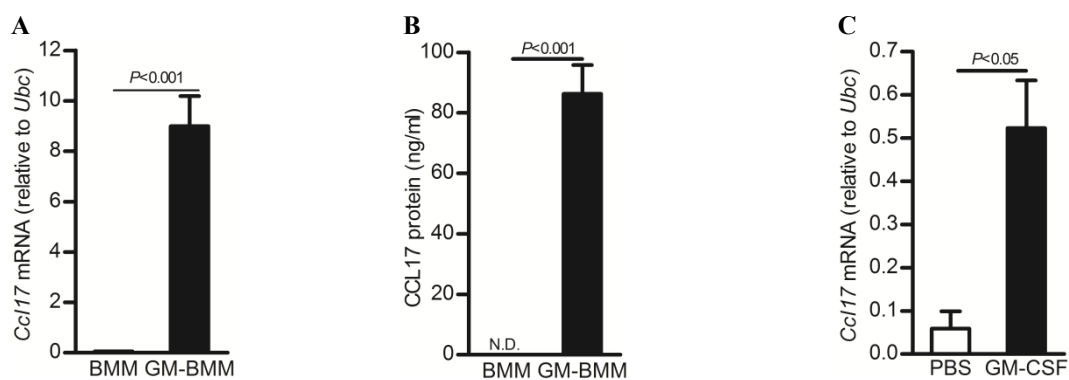

**Figure S1: GM-CSF upregulates CCL17 expression in in vitro-derived and ex vivo murine macrophage populations**

(A-B) Murine bone cells were cultured in either M-CSF (5,000 U/ml) or GM-CSF (20 ng/ml) for 7 days to derive BMM and GM-BMM, respectively: (A) *Ccl17* mRNA (qPCR) and (B) secreted CCL17 by ELISA. (C) *Ccl17* mRNA expression in resident peritoneal macrophages following treatment with either PBS (vehicle) or GM-CSF (20 ng/ml) for 24 h (n=4). Graphs are plotted as mean  $\pm$  SEM. N.D., not detected. P values were obtained using a t-test.

**Figure S2**

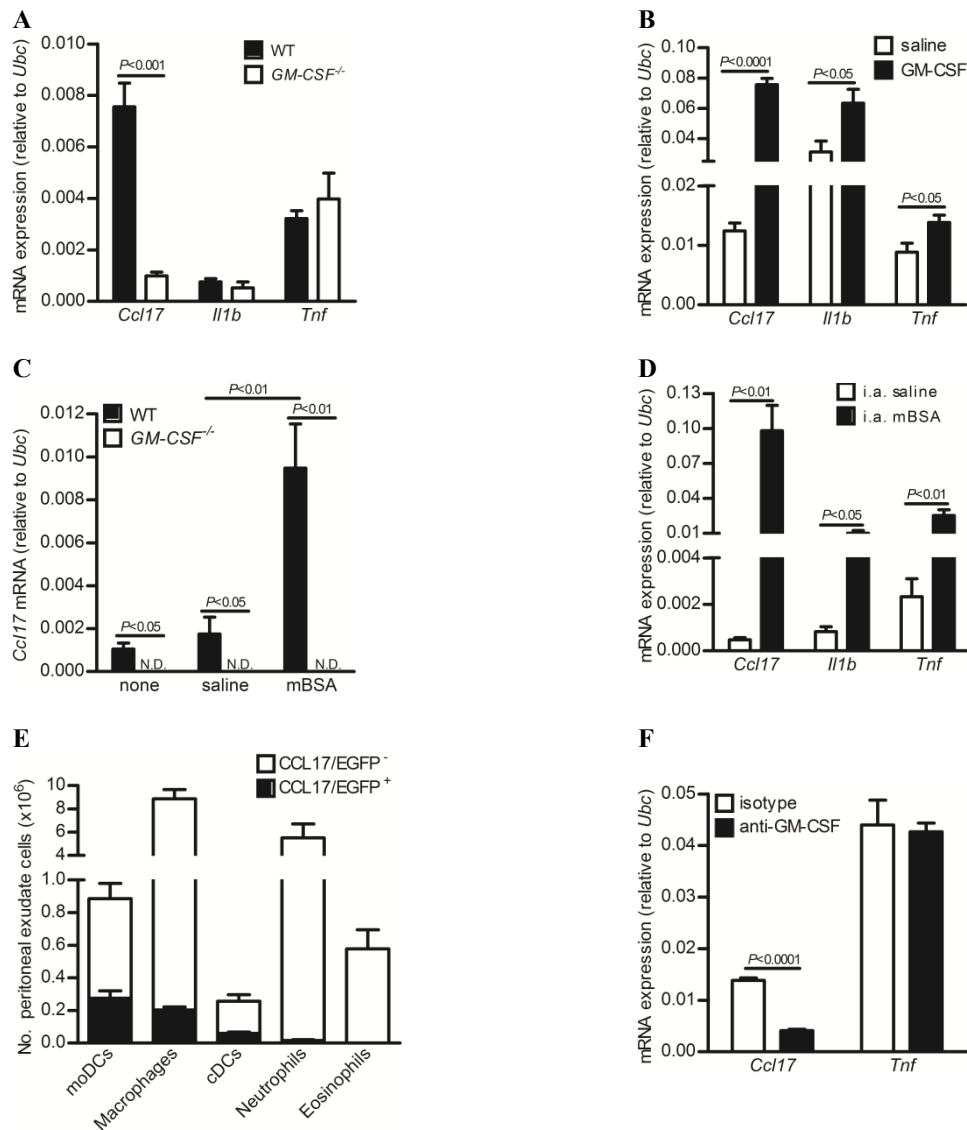

**Figure S2: Dependence of CCL17 expression on GM-CSF in vivo**

(A-B) *Ccl17*, *Il1b* and *Tnf* mRNA expression (qPCR) (A) in the naïve hind footpad of WT and *GM-CSF*<sup>-/-</sup> mice and (B) in the hind footpad of WT mice 4 h post intraplantar (i.pl.) injection of GM-CSF (20 ng). n=12 mice/group.

(C) *Ccl17* mRNA expression in non-injected naïve joints (none) or joints injected intra-articularly (i.a.) with saline or methylated BSA (mBSA) from WT and *GM-CSF*<sup>-/-</sup> mice. (D) mRNA expression in WT mice 7 days following i.a. injection of mBSA or saline (day 0) and subcutaneous (s.c.) injection of GM-CSF (500 ng) on days 0-2. n=5 mice/group. N.D., not detected.

(E-F) Antigen-induced peritonitis was induced in (E) *Ccl17*<sup>E/+</sup> mice and the number of CCL17/EGFP<sup>+</sup> and CCL17/EGFP<sup>-</sup> moDCs (CD115<sup>+</sup>MHCII<sup>+</sup>CD11c<sup>+</sup>), macrophages (CD115<sup>+</sup>MHCII<sup>+</sup>CD11c<sup>-</sup>), cDCs (CD115<sup>+</sup>MHCII<sup>+</sup>CD11c<sup>+</sup>), neutrophils (Ly6G<sup>+</sup>CD11b<sup>+</sup>) and eosinophils (Ly6G<sup>+</sup>CD11b<sup>int</sup>SSc<sup>hi</sup>) in the peritoneum (day 4) quantified. (F) WT mice were treated i.p. on days 1 and 2 with anti-GM-CSF mAb or isotype control following antigen-induced peritonitis induction and CCL17 and TNF mRNA expression was determined in total peritoneal exudate cells (day 4). n=5 mice/group.

Graphs were plotted as mean  $\pm$  SEM. P values were obtained using a t-test.

**Figure S3**

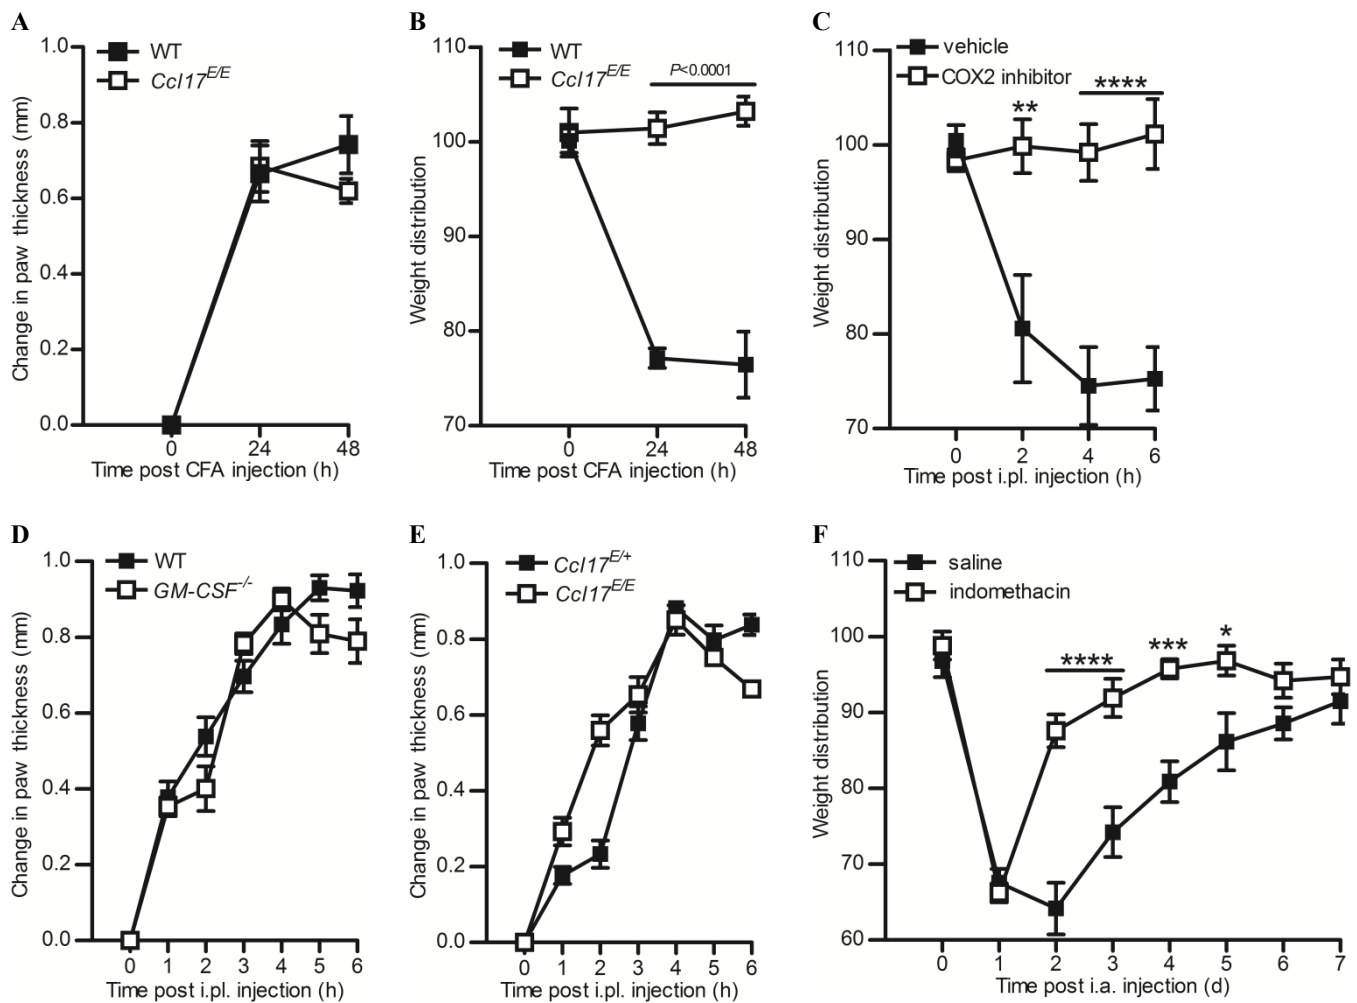

**Figure S3: The requirement for CCL17 in GM-CSF-dependent inflammatory and arthritic pain**

**(A-B)** WT and *Ccl17<sup>EE</sup>* mice received an intraplantar (i.pl.) injection of Complete Freund's Adjuvant (CFA) and **(A)** pain (incapacitance meter) and **(B)** footpad swelling (callipers) were measured (n=5 per group).

**(C)** WT mice were pre-treated with the COX2 inhibitor, SC58125 (i.p. 5 mg/kg) or vehicle, 30 min prior to i.pl. zymosan and pain (incapacitance meter) was measured. **(D-E)** change in paw thickness (swelling) following i.pl. injection of zymosan in **(D)** WT and *GM-CSF<sup>-/-</sup>* mice and **(E)** *Ccl17<sup>E/+</sup>* and *Ccl17<sup>EE</sup>* mice (n=5 per group).

**(F)** Zymosan-induced arthritis in WT mice; indomethacin (1 mg/kg) was given i.p. daily from day 1 and pain measured. n=6 per group.

Results are mean  $\pm$  SEM. P values were obtained using a 2-way ANOVA test.

\* $P < 0.05$ , \*\* $P < 0.01$ , \*\*\* $P < 0.001$ , \*\*\*\* $P < 0.0001$ , vehicle/saline vs. COX2 inhibitor/indomethacin.

**Figure S4**

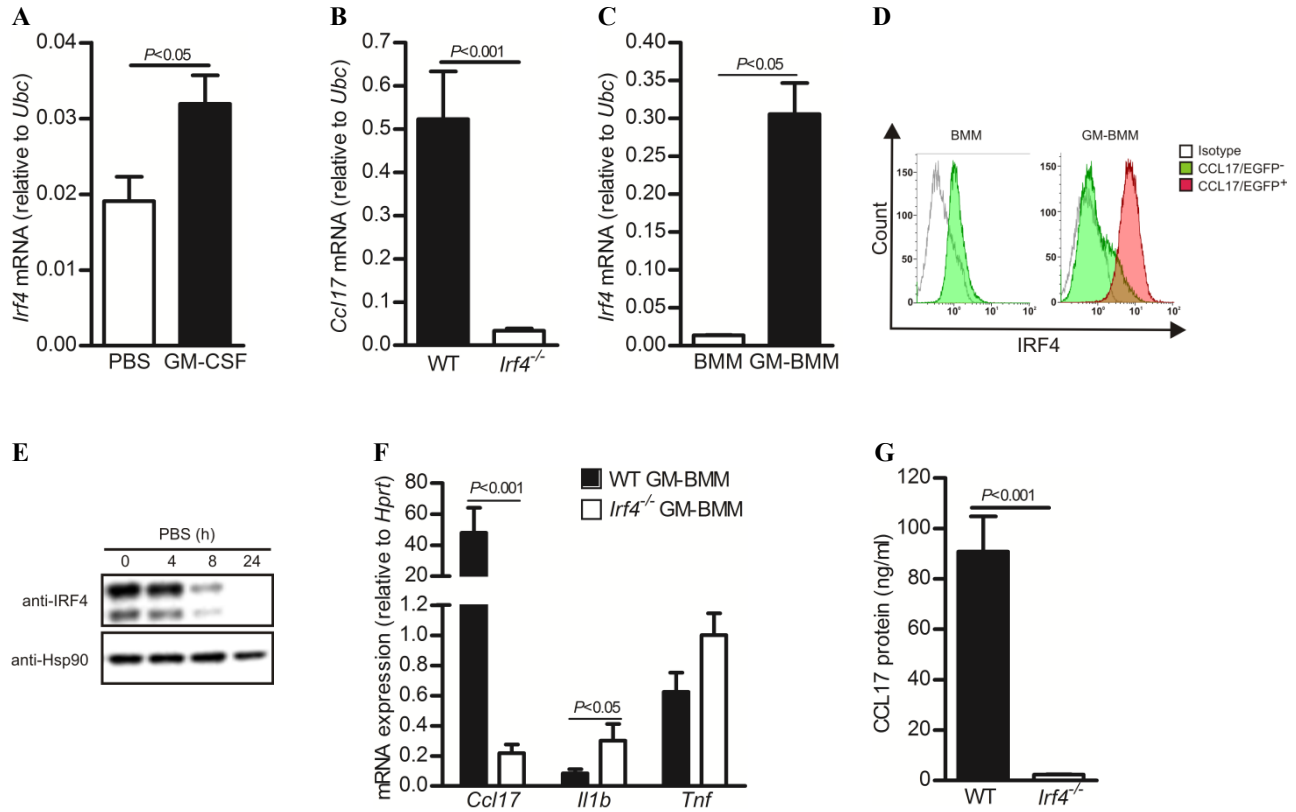

**Figure S4: GM-CSF-induced CCL17 expression in ex vivo- and in vitro-derived macrophage populations is IRF4-dependent**

(A-B) Resident peritoneal macrophages were treated with PBS (vehicle) and GM-CSF (20 ng/ml) for 24 h: (A) *Irf4* mRNA expression in WT macrophages and (B) *Ccl17* mRNA expression in WT and *Irf4*<sup>-/-</sup> macrophages (n=4).

(C-E) Murine bone marrow cells were cultured in either GM-CSF (20 ng/ml) or M-CSF (5,000 U/ml) for 7 days to derive GM-BMM and BMM, respectively: (C) basal *Irf4* mRNA expression (qPCR), (D) representative histograms of IRF4 in CCL17/GFP<sup>+</sup> and CCL17/GFP<sup>-</sup> populations of GM-BMM and BMM (from *Ccl17*<sup>E/+</sup> mice) and (E) whole cell lysates from GM-BMM following withdrawal of GM-CSF for indicated periods of time were subjected to Western blotting with anti-IRF4 and anti-Hsp90 antibodies (n=5). (F-G) Bone marrow cells from WT and *Irf4*<sup>-/-</sup> mice were cultured in GM-CSF (20 ng/ml) for 7 days to derive GM-BMM: (F) mRNA expression of cytokines and (G) secreted CCL17 by ELISA (n=4).

Graphs are plotted as mean ± SEM. P values were obtained using a t-test.

**Figure S5**

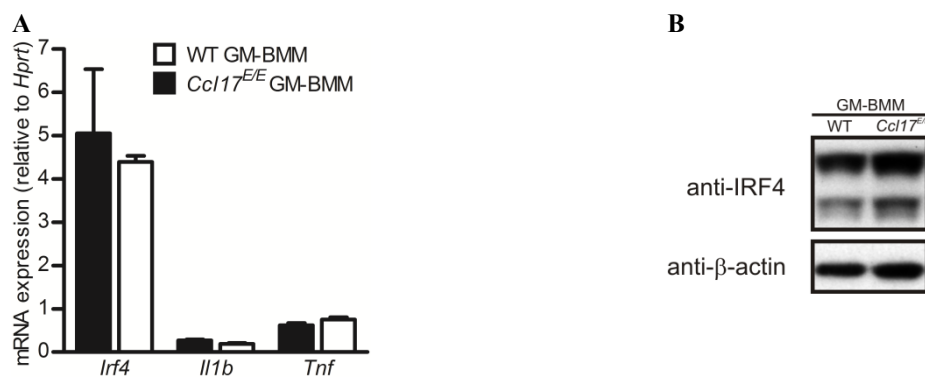

**Figure S5: IRF4 is not downstream of CCL17 in murine macrophages**

**(A-B)** Bone marrow cells from both from WT and *Ccl17<sup>E/E</sup>* mice were cultured in GM-CSF (20 ng/ml) for 7 days to derive GMBMM: **(A)** basal mRNA expression (qPCR) and **(B)** whole cell lysates were subjected to Western blotting with anti-IRF4 and anti-actin antibodies (n=3). Graphs are plotted as mean  $\pm$  SEM.

**Table S1:** Cytokines/chemokines, according to their log<sub>2</sub> fold-change in gene expression (microarray), following GM-CSF treatment versus PBS control for 16 h ( $P < 0.05$ ) in human monocytes (n=3 donors).

| <b>Cytokine/chemokine</b> | <b>Log<sub>2</sub> fold-change</b> | <b>P-value</b> |
|---------------------------|------------------------------------|----------------|
| <i>CCL17</i>              | 5.33                               | 3.42E-07       |
| <i>INHBA</i>              | 4.77                               | 5.53E-08       |
| <i>IL1b</i>               | 4.34                               | 3.52E-08       |
| <i>CXCL7</i>              | 4.20                               | 3.00E-09       |
| <i>CXCL5</i>              | 4.14                               | 4.60E-09       |
| <i>CXCL1</i>              | 3.78                               | 1.57E-06       |
| <i>CCL3</i>               | 3.17                               | 3.98E-05       |
| <i>IL19</i>               | 2.94                               | 2.15E-06       |
| <i>CCL24</i>              | 2.45                               | 1.90E-05       |
| <i>TNF</i>                | 2.01                               | 0.008          |
| <i>CCL4</i>               | 1.86                               | 0.013          |
| <i>CXCL2</i>              | 1.74                               | 0.005          |
| <i>CXCL3</i>              | 1.69                               | 0.018          |
| <i>CCL7</i>               | 1.26                               | 0.049          |
| <i>CCL1</i>               | 1.18                               | 0.027          |
| <i>CCL14</i>              | 1.17                               | 0.018          |
| <i>CCL26</i>              | 0.93                               | 0.045          |
| <i>IL9</i>                | -1.75                              | 0.011          |
